# Supplementary material for: Accuracy of Model-Based Iterative Reconstruction for CT Volumetry of Part-Solid Nodules and Solid Nodules in Comparison with Filtered Back Projection and Hybrid Iterative Reconstruction at Various Dose Settings: An Anthropomorphic Chest Phantom Study
Source: PubMed Central journal article supplement — Korean J Radiol. 2019 Jun 25;20(7):1195–206. doi: 10.3348/kjr.2018.0893 (PMC6609437; doi:10.3348/kjr.2018.0893), 2019-06-25
Supplement: kjr-20-1195-s003.pdf [file kjr-20-1195-s003.pdf]

**Supplementary Table 1. Summary of Study Protocol and Radiation Dose Data**

| Tube Voltage (kVp) | Tube Current Time Product (mAs) | Reconstruction Algorithm       | CTDIvol (mGy) | DLP (mGy*cm) | ED (mSv)* | Dose Reduction (%) <sup>†</sup> |
|--------------------|---------------------------------|--------------------------------|---------------|--------------|-----------|---------------------------------|
| 80                 | 10                              | FBP                            | 0.3           | 10.5         | 0.11      | 97.1                            |
| 120                | 10                              | HIR (iDose <sup>4†</sup> )     | 0.9           | 31.5         | 0.39      | 89.9                            |
| 120                | 20                              | MIR                            | 1.8           | 63.1         | 0.77      | 80.3                            |
| 120                | 50                              | (IMR-R1,                       | 4.5           | 157.7        | 1.96      | 49.8                            |
| 120                | 100                             | IMR-ST1, IMR-SP1) <sup>§</sup> | 9.0           | 315.4        | 3.89      | 0                               |

\*Conversion factor of 0.014 was used for estimation of ED, <sup>†</sup>Dose reduction of each CT scan was calculated compared to 120 kVp and 100 mAs acquisition, <sup>‡</sup>iDose<sup>4</sup>; Philips Healthcare, <sup>§</sup>IMR; Philips Healthcare. CTDIvol = volume CT dose index, DLP = dose-length product, ED = effective dose, FBP = filtered back projection, HIR = hybrid iterative reconstruction, IMR-R1 = body routine level 1, IMR-ST1 = body soft tissue level 1, IMR-SP1 = sharp plus level 1, MIR = model-based iterative reconstruction
