# Supplementary figures and images for: Accuracy of Model-Based Iterative Reconstruction for CT Volumetry of Part-Solid Nodules and Solid Nodules in Comparison with Filtered Back Projection and Hybrid Iterative Reconstruction at Various Dose Settings: An Anthropomorphic Chest Phantom Study
Source: PubMed Central journal article supplement — Korean J Radiol. 2019 Jun 25;20(7):1195–206. doi: 10.3348/kjr.2018.0893 (PMC6609437; doi:10.3348/kjr.2018.0893), 2019-06-25

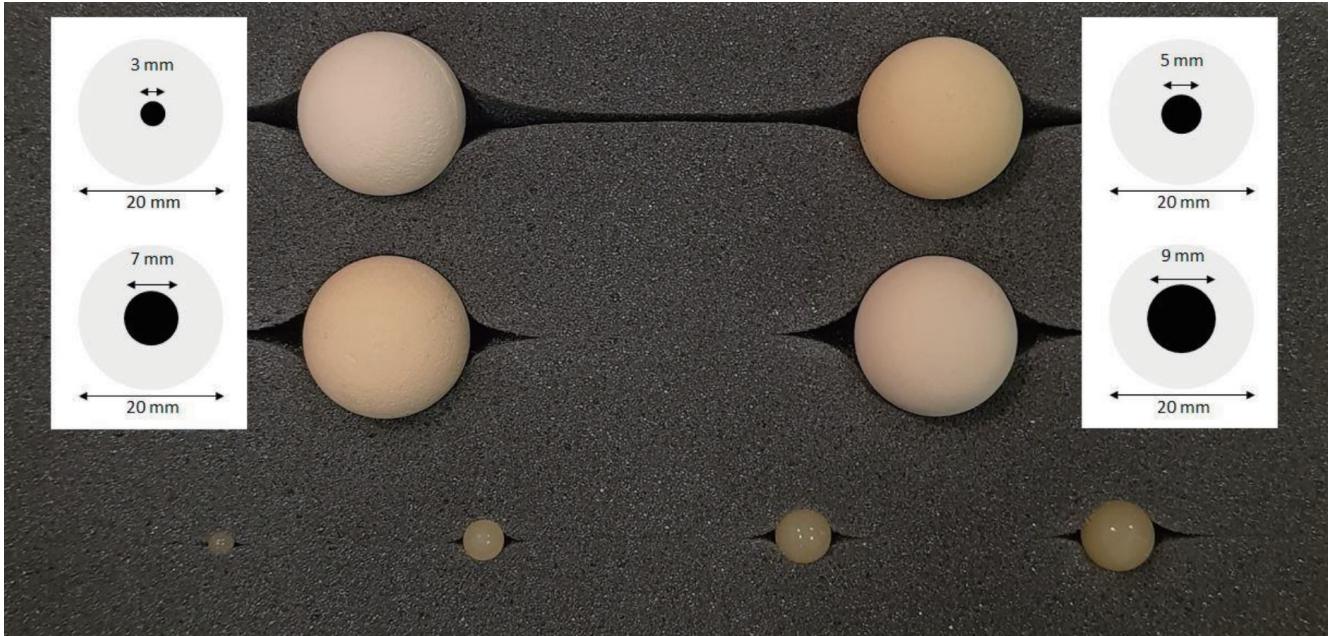

Supplementary Fig. 1. Characteristics of eight spherical synthetic pulmonary nodules.

Supplement: kjr-20-1195-s001.pdf [file kjr-20-1195-s001.pdf]
